# Supplementary material for: The Added Value of Neuro-informed Assessment of Externalizing Behavior Problems: A Prospective Population-Based Neuroimaging Study
Source: Research Square preprint supplement (doi:10.21203/rs.3.rs-6906172/v1), 2025-07-02
Supplement: Supplementary file 1 [file 1f523128f2c82ba24cdb0ab2.xlsx]

## Sheet: Blad1
Table 1: Descriptive characteristics of the study population
Variable	Construct	Total sample – no EB (N=1480)	Total sample – EB (N=528)	Training sample – no EB (N=320)	Training sample – EB (N=320)
Gender	Boy	681 (46.0%)	280 (53.0%)	151 (47.2%)	163 (50.9%)
	Girl	799 (54.0%)	248 (47.0%)	169 (52.8%)	157 (49.1%)
Education	No education or Primary	66 (4.7%)	27 (5.5%)	11 (3.4%)	12 (3.7%)
	Secondary	516 (37.1%)	190 (38.5%)	109 (34.1%)	101 (31.6%)
	High	810 (58.2%)	277 (56.0%)	200 (62.5%)	207 (64.7%)
Income	Low	219 (21.0%)	87 (24.4%)	74 (24.6%)	72 (24.2%)
	High	826 (79.0%)	269 (75.6%)	227 (75.4%)	225 (75.8%)
Age (mean+SD)	At MRI visit-10	9.75 (0.3)	9.80 (0.4)	9.75 (0.2)	9.75 (0.3)
CBCL/6-18 Syndrome scales (med + IQR)	Anxious or depressed	1 (0-3)	3 (1-5)	1 (0-2)	3 (1-5)
	Withdrawn behavior	0 (0-1)	1 (0-2)	0 (0-1)	1 (0-2)
	Somatic complaints	1 (0-2)	1 (0-3)	1 (0-2)	1 (0-3)
	Social problems	1 (0-2)	1 (0-4)	0 (0-1)	2 (1-4)
	Thought problems	1 (0-2)	2 (1-3)	1 (0-2)	1 (0-3)
	Attention problems	2 (0-4)	4 (2-6)	1 (0-3)	4 (2-6)
	Rule-breaking behavior	0 (0-1)	2 (0-3)	0 (0-1)	1 (0-2)
	Aggressive behavior	1 (0-2,1)	4.2 (2-8)	1 (0-2)	4 (2-7)
Adverse events (med + IQR)	Sum score	3 (2-5)	4 (3-7)	3 (2-5)	4 (3-6)
Callous traits (med + IQR)	Sum score	1 (0-2,5)	3 (1-4)	1 (0-2)	2 (1-4)
Notes: EB = externalizing behavior; Med = median; IQR = interquartile range; SD = standard deviation; CBCL = Child behavior checklist
