# Supplementary material for: The Added Value of Neuro-informed Assessment of Externalizing Behavior Problems: A Prospective Population-Based Neuroimaging Study
Source: Research Square preprint supplement (doi:10.21203/rs.3.rs-6906172/v1), 2025-07-02
Supplement: Supplementary file 2 [file 9e3d1de435e464314be8106e.xlsx]

## Sheet: Blad1
Table 2: Predictive performance of different models
Variables/models	N tree	M try	OOB-error	ACC	SENS	SPEC	AUC
Baseline Model	1000	15	27.9	0.73	0.71	0.75	0.81
Extended Model	700	15	27.6	0.73	0.72	0.74	0.80
Neural Model	800	15	26.7	0.74	0.71	0.78	0.81
Final Model	700	15	23.6	0.78	0.73	0.80	0.82
Notes: N tree = number of trees; M try = number of try’s; OOB-error = out of the bag-error; ACC = accuracy, SENS = sensitivity; SPEC = specificity; AUC = area under the curve.
